# Supplementary material for: Does obesity create a relative sense of excess poverty?
Source: Frontiers journal article supplement (doi:10.3389/fpubh.2024.1480365), 2024-11-27
Supplement: Data_Sheet_1.pdf [file Data_Sheet_1.pdf]

## Appendix A: Detailed Description of the Ordered Probit Regression

This study employs the ordered probit methodology, which is based on the following non-linear formula of the cumulative normal distribution function:  $\int_{-\infty}^{\infty} \frac{e^{-(x-\mu)^2/2\sigma^2}}{\sqrt{2\pi\sigma^2}} dx$ .<sup>1</sup>

Following Johnston and Dinardo (1997 [41]) and Frey & Stutzer (2002 [27]) we define the following ordered probit empirical model:

This model is designed to exploit the ordering information, where category  $i = 1$  (the subject often considers himself or herself poor) is defined as the minimum value of the variable,  $i = 2$  (the subject sometimes considers himself or herself poor) as the next ordered value, and so on, for the empirically determined  $i=4$  categories (the subject never considers himself or herself poor).

The projected probability of switching from one category to the subsequent one ( $p_{ij}$ ) for category  $i$  and subject  $j$  is given by the following equation:

$$p_{ij} = Pr(y_j = i) = Pr(k_{i-1} < x_j\beta + u \leq k_i) = \Phi(k_i - x_j\beta) - \Phi(k_{i-1} - x_j\beta) \quad (1)$$

Where  $k_i$  is the ordinal number for category  $i$ ,  $k_0$  is defined as  $-\infty$ ,  $k_5$  is defined as  $+\infty$ ,  $y_j = wealth$ ;  $\Phi(\cdot)$  is the cumulative normal distribution function,  $x_j$  is a matrix of  $j$  individuals (rows) and two independent variables (columns of  $x_j = (BMI2016; \ln(Total\_INC2016))$ ).

More specifically to our case, the model may be defined as follows:

$$prob(1 \leq Self\_Rank\_Poverty\_2016 \leq 2) = F(cut_1 - \alpha_1 Total\_Inc2016 - \alpha_2 BMI2016)$$

---

<sup>1</sup> Information about this methodology is based on the Stata 16.1 manual. According to Frey & Stutzer (2002 [27]): “Provided that reported subjective well-being is a valid and empirically adequate measure for human well-being, it can be modeled in a microeconomic happiness function  $W_{it} = \alpha + \beta X_{it} + \epsilon_{it}$  that is estimated by ordered probit or logit.” (page 406).

$$prob(2 \leq Self\_Rank\_Poverty\_2016 \leq 3) = F(cut_2 - \alpha_1 \ln(Total\_Inc2016) - \alpha_2 BMI2016) - F(cut_1 - \alpha_1 \ln(Total\_Inc2016) - \alpha_2 BMI2016)$$

$$prob(3 \leq Self\_Rank\_Poverty\_2016 \leq 4) = F(cut_3 - \alpha_1 \ln(Total\_Inc2016) - \alpha_2 BMI2016) - F(cut_2 - \alpha_1 \ln(Total\_Inc2016) - \alpha_2 BMI2016) - F(cut_1 - \alpha_1 \ln(Total\_Inc2016) - \alpha_2 BMI2016)$$

$$prob(Self\_Rank\_Poverty\_2016 = 1) = 1 - F(cut_3 - \alpha_1 \ln(Total\_Inc2016) - \alpha_2 BMI2016) - F(cut_2 - \alpha_1 \ln(Total\_Inc2016) - \alpha_2 BMI2016) - F(cut_1 - \alpha_1 \ln(Total\_Inc2016) - \alpha_2 BMI2016)$$

Where *Self\_Rank\_Poverty\_2016* is the self-ranking of individuals in response to the question: “During the last 15 years, how often did you consider yourself poor?” Possible answers are 1=“often”, 2=“sometimes”, 3=“rarely”, 4=“never”; the independent variables are  $\ln(Total\_Inc2016)$  and  $BMI2016$

The estimated log likelihood function is given by the following equation:

$$\ln L = \sum_{j=1}^N \omega_j \sum_{i=1}^4 I_i(y_j) \ln p_{ij} \quad (2)$$

Where  $\ln L$  is the natural logarithm of the log-likelihood function;  $\omega_j$  is the optional weight (the

default is  $\omega_j = \frac{1}{N}$  where  $N$  is the number of subjects); and  $I_i(y_j) = \begin{cases} 1, & \text{if } y_j = i \\ 0, & \text{otherwise} \end{cases}$  outcomes also

give three cutoff points (one for each shift from one category to another).
